# Supplementary material for: Clinical and Laboratory Predictors of Long-Term Outcomes after Catheter Ablation for a Ventricular Electrical Storm
Source: J Interv Cardiol. 2024 Feb 5;2024:5524668. doi: 10.1155/2024/5524668 (PMC10861284; doi:10.1155/2024/5524668)

UCK w- Edlansku Zakla

S

3D  
Ex: 11321

Se: 2 +c  
Volume Rendering No cut  
DoB:  
Ex:

DFOV 82.3 cm  
STND/+

R P

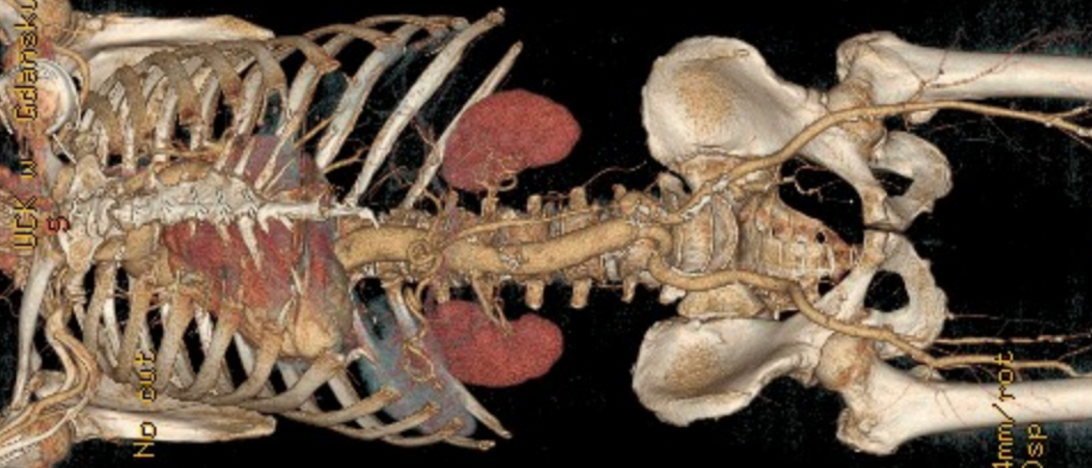

I

No VOI  
kv 120  
mA Mod.  
Rot 0.50s/HE+ 39.4mm/rot  
1.2mm 0.984:1/0.80sp  
Tilt: 0.0  
02:26:49 PM  
W = 753 L = 212

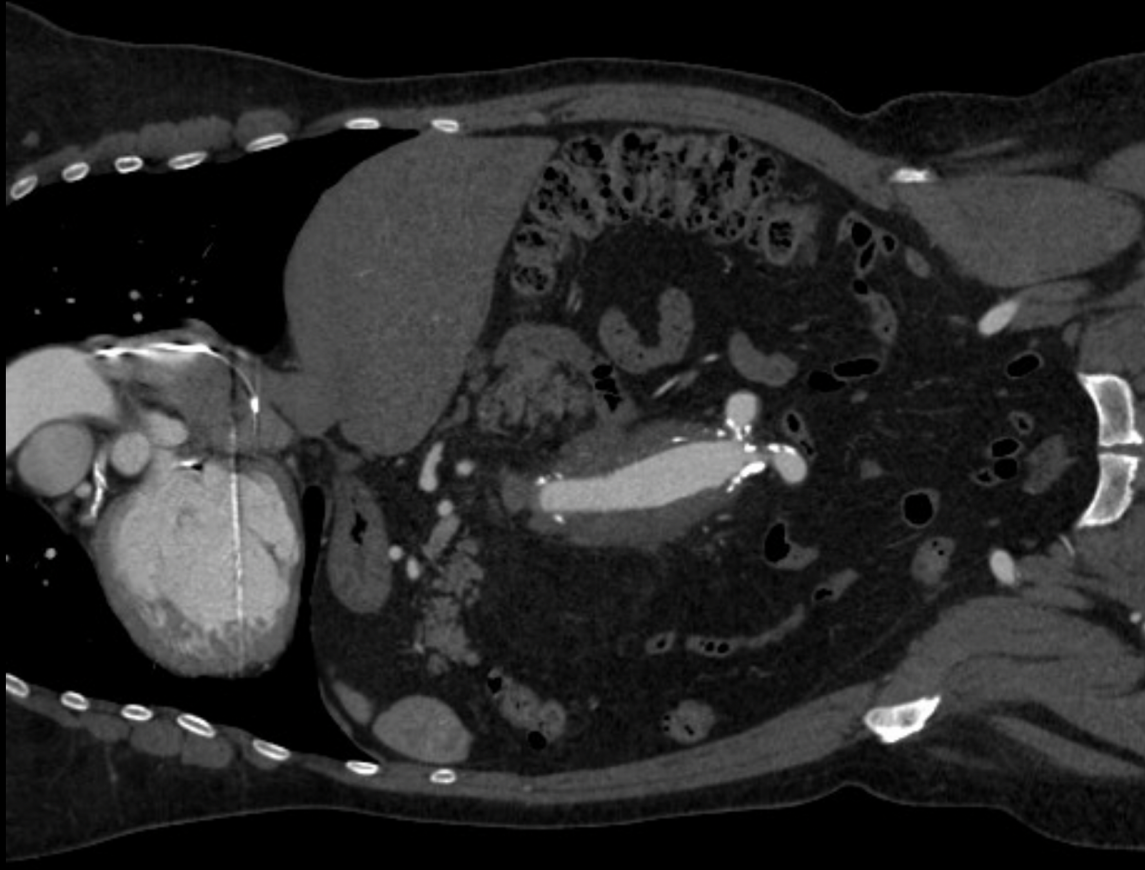

Supplement: Supplementary Materials — Supplementary Figure 1: computed tomography 3D reconstruction and scan showing a patient undergoing RF ablation with dextrocardia and visceral inversion. Central illustration: risk factors of effective and ineffective ventricular electrical storm ablation. [file 5524668.f1.zip › Supplementary Figure 1.pdf]
